# Supplementary material for: Interplay between Caveolin-1 and body and tumor size affects clinical outcomes in breast cancer
Source: PubMed Central journal article supplement (PMC9166433; doi:10.1016/j.tranon.2022.101464), 2022-06-01
Supplement: mmc1.pdf [file mmc1.pdf]

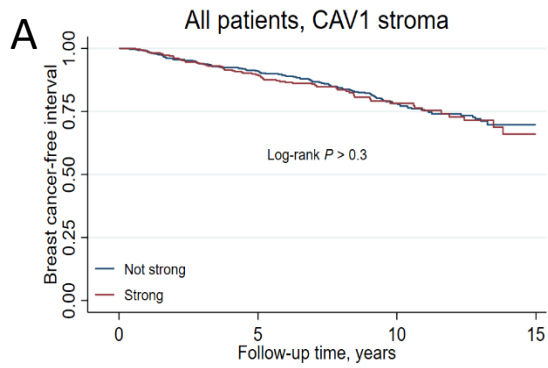

|                |     |     |     |     |
|----------------|-----|-----|-----|-----|
| Number at risk |     |     |     | NoE |
| Not strong     | 575 | 475 | 223 | 29  |
| Strong         | 340 | 276 | 84  | 13  |
|                |     |     |     | 65  |

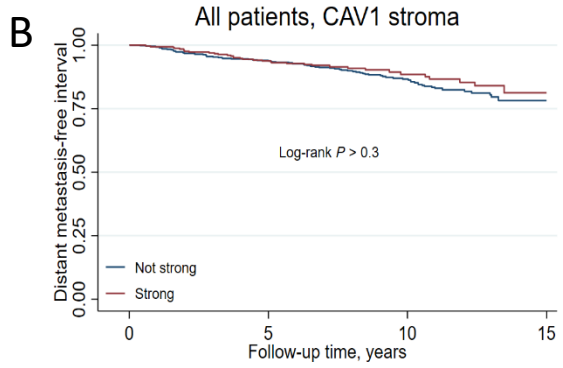

|                |     |     |     |     |
|----------------|-----|-----|-----|-----|
| Number at risk |     |     |     | NoE |
| Not strong     | 575 | 490 | 245 | 33  |
| Strong         | 340 | 287 | 97  | 16  |
|                |     |     |     | 80  |
|                |     |     |     | 35  |

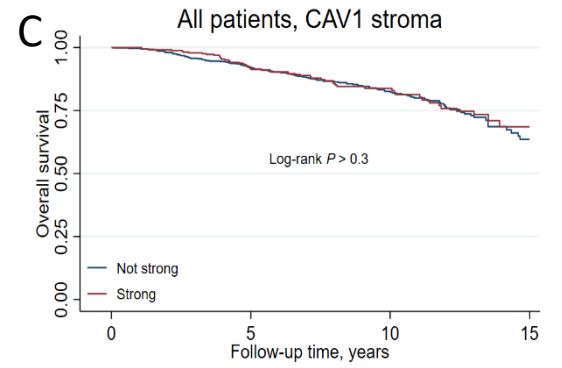

|                |     |     |     |     |
|----------------|-----|-----|-----|-----|
| Number at risk |     |     |     | NoE |
| Not strong     | 575 | 500 | 251 | 34  |
| Strong         | 340 | 290 | 101 | 16  |
|                |     |     |     | 115 |
|                |     |     |     | 56  |

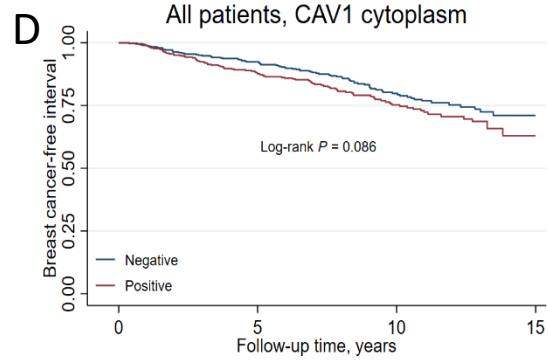

|                |     |     |     |     |
|----------------|-----|-----|-----|-----|
| Number at risk |     |     |     | NoE |
| Negative       | 493 | 413 | 166 | 29  |
| Positive       | 393 | 318 | 135 | 13  |
|                |     |     |     | 89  |
|                |     |     |     | 90  |

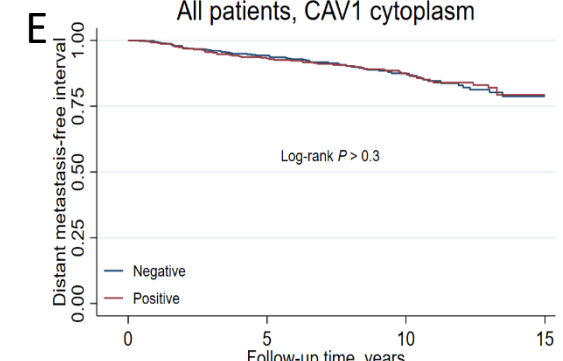

|                |     |     |     |     |
|----------------|-----|-----|-----|-----|
| Number at risk |     |     |     | NoE |
| Negative       | 493 | 420 | 179 | 32  |
| Positive       | 393 | 336 | 157 | 17  |
|                |     |     |     | 62  |
|                |     |     |     | 50  |

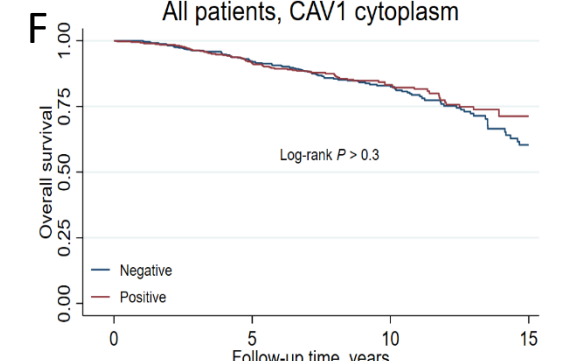

|                |     |     |     |     |
|----------------|-----|-----|-----|-----|
| Number at risk |     |     |     | NoE |
| Negative       | 493 | 427 | 187 | 33  |
| Positive       | 393 | 341 | 159 | 17  |
|                |     |     |     | 100 |
|                |     |     |     | 69  |

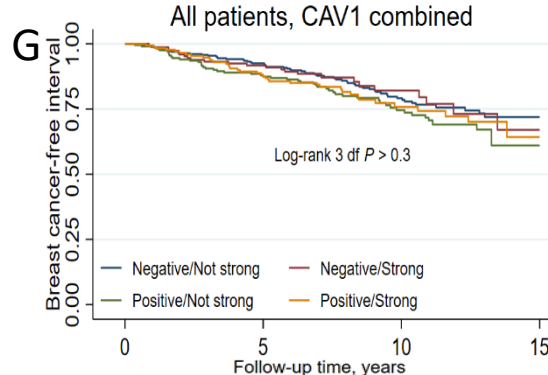

|                     |     |     |     |     |
|---------------------|-----|-----|-----|-----|
| Number at risk      |     |     |     | NoE |
| Negative/Not strong | 334 | 281 | 129 | 21  |
| Negative/Strong     | 150 | 124 | 32  | 8   |
| Positive/Not strong | 207 | 166 | 79  | 8   |
| Positive/Strong     | 175 | 142 | 50  | 4   |
|                     |     |     |     | 38  |

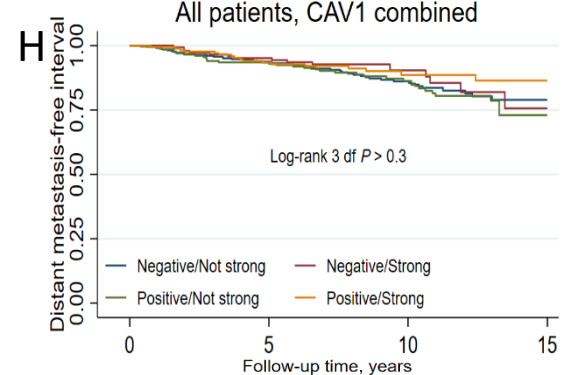

|                     |     |     |     |     |
|---------------------|-----|-----|-----|-----|
| Number at risk      |     |     |     | NoE |
| Negative/Not strong | 334 | 284 | 137 | 23  |
| Negative/Strong     | 150 | 128 | 37  | 9   |
| Positive/Not strong | 207 | 177 | 92  | 10  |
| Positive/Strong     | 175 | 149 | 58  | 6   |
|                     |     |     |     | 17  |

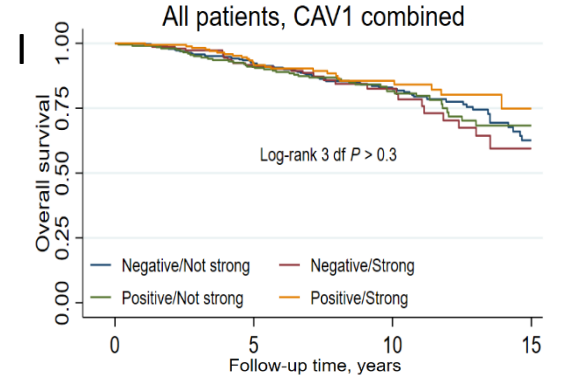

|                     |     |     |     |     |
|---------------------|-----|-----|-----|-----|
| Number at risk      |     |     |     | NoE |
| Negative/Not strong | 334 | 291 | 142 | 24  |
| Negative/Strong     | 150 | 128 | 40  | 9   |
| Positive/Not strong | 207 | 180 | 93  | 10  |
| Positive/Strong     | 175 | 151 | 59  | 6   |
|                     |     |     |     | 28  |
|                     |     |     |     | 42  |
|                     |     |     |     | 25  |
